# Supplementary material for: Hydrogen Peroxide and Dopamine Sensors Based on Electrodeposition of Reduced Graphene Oxide/Silver Nanoparticles
Source: MDPI journal article supplement (doi:10.3390/s24020355), 2024-01-07
Supplement: s1 [file s1]

## Supporting information

# Hydrogen peroxide and dopamine sensors based on electrodeposition of reduced graphene oxide/silver nanoparticles

Yuhang Zhang <sup>1</sup>, Na Li <sup>1,2</sup> Bo Liu <sup>1,2</sup> and Hangyu Zhang <sup>1,2,\*</sup>

<sup>1</sup> School of Biomedical Engineering, Faculty of Medicine, Dalian University of Technology, Dalian 116024, China

<sup>2</sup> Liaoning Key Lab of Integrated Circuit and Biomedical Electronic System, Dalian University of Technology, Dalian 116024, China

\* Correspondence: hangyuz@dlut.edu.cn

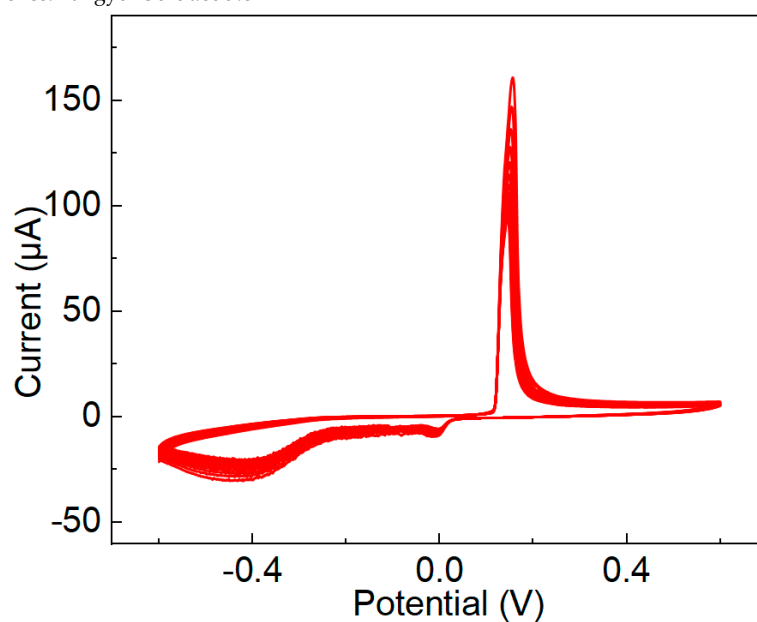

**Figure S1.** CV curves of AgNPs/rGO/GCE electrodes scanned for 30 cycles in PBS solution.

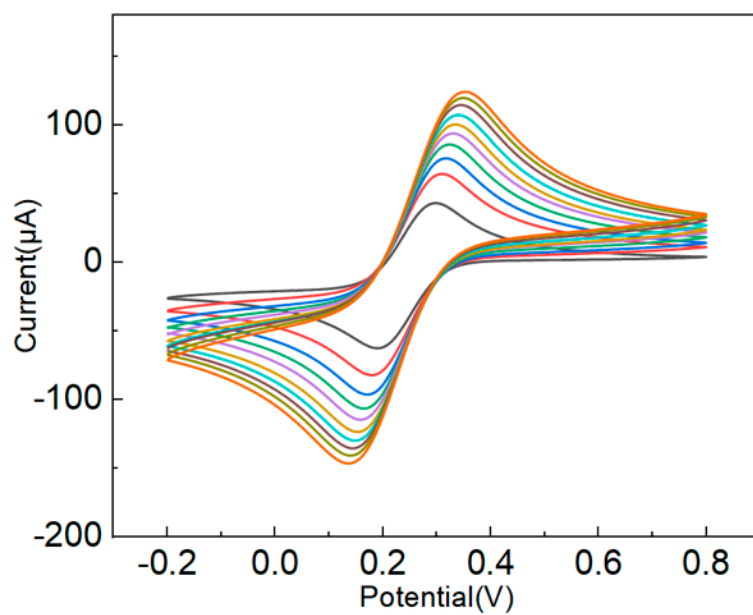

**Figure S2.** CV curves of the GCE in 20 mM  $\text{K}_3[\text{Fe}(\text{CN})_6]$ , 0.1 M KCl solution with scanning speed from 0.02 V/S to 0.2 V/S.

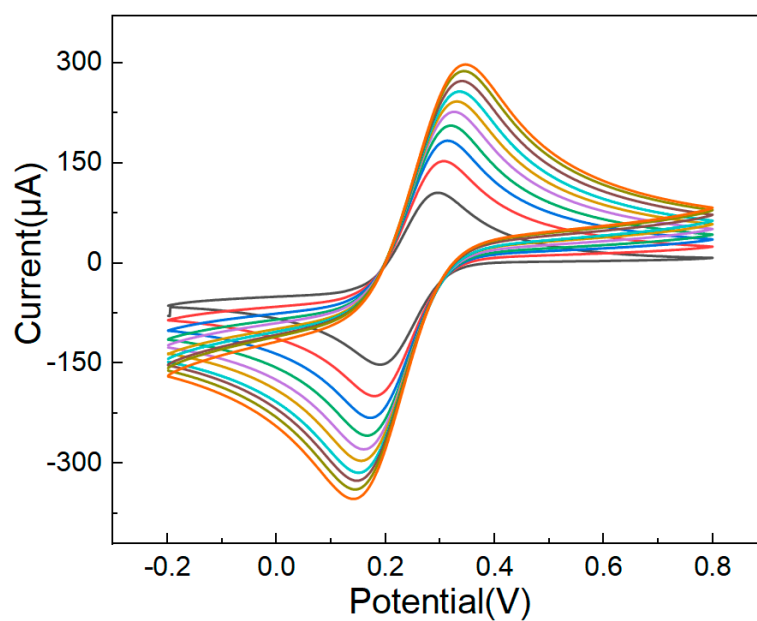

**Figure S3.** CV curves of the AgNPs/rGO/GCE in 20 mM  $\text{K}_3[\text{Fe}(\text{CN})_6]$ , 0.1 M KCl solution with scanning speed from 0.02 V/S to 0.2 V/S.

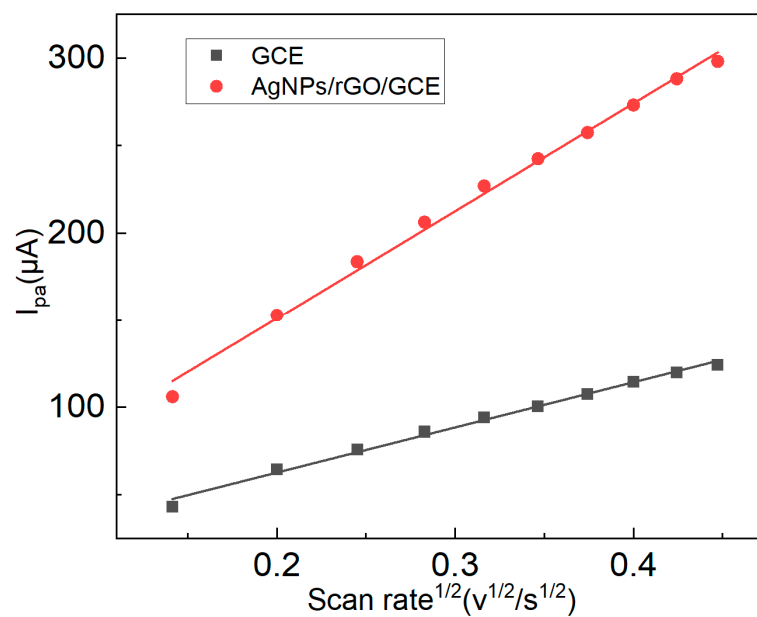

**Figure S4.** Fitting curves of the peak current values of GCE and AgNPs/rGO/GCE vs. the scanning speed.

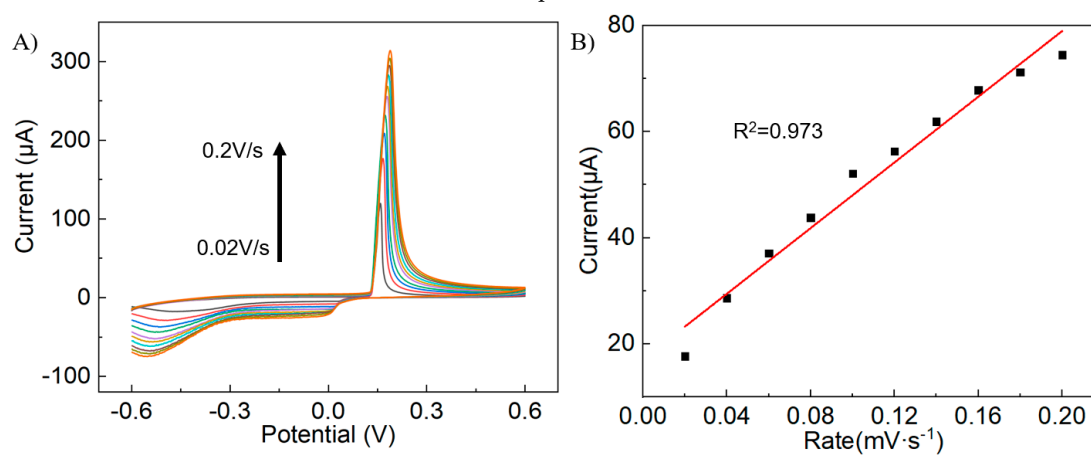

**Figure S5.** (A) CV curves of AgNPs/rGO/GCE in PBS solution at different scan rates from 20 to 200 mV/s. (B) Plots of cathodic peak currents vs. scan rate.
